# Supplementary material for: Bottom-up fabrication of triazine-based frameworks as metal-free materials for supercapacitors and oxygen reduction reaction
Source: Royal Society of Chemistry journal article supplement (doi:10.1039/d1ra00043h), 2021-01-01
Supplement: d1ra00043h1.pdf [file d1ra00043h1.pdf]

Supporting Information

**Bottom-up fabrication of triazine-based frameworks  
as metal-free materials for supercapacitors and oxygen  
reduction reaction**

Ronghan Cao,<sup>a</sup> Fangyuan Hu,<sup>b,\*</sup> Tianpeng Zhang,<sup>b</sup> Wenlong Shao,<sup>b</sup> Siyang Liu,<sup>b</sup> Xigao  
Jian<sup>a,b,c,\*</sup>

<sup>a</sup> *State Key Laboratory of Fine Chemicals, Department of Polymer Materials & Engineering, Liaoning Province Engineering Research Centre of High Performance Resins. Dalian University of Technology, Dalian, 116024, China.*

<sup>b</sup> *School of Materials Science and Engineering, Key Laboratory of Energy Materials and Devices (Liaoning Province), State Key Laboratory of Fine Chemicals, Liaoning Province Engineering Centre of High Performance Resins. Dalian University of Technology, Dalian 116024, China.*

<sup>\*</sup> *Corresponding Authors. E-mail: hufangyuan@dlut.edu.cn (F. Y. Hu), jian4616@dlut.edu.cn (X. Jian).*

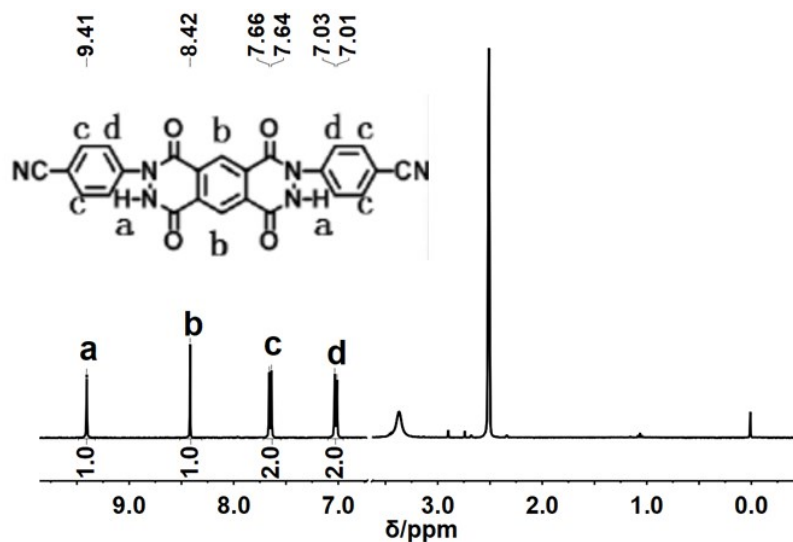

Fig. S1. <sup>1</sup>H-NMR spectrum of PYPZ (in DMSO-d<sub>6</sub>).

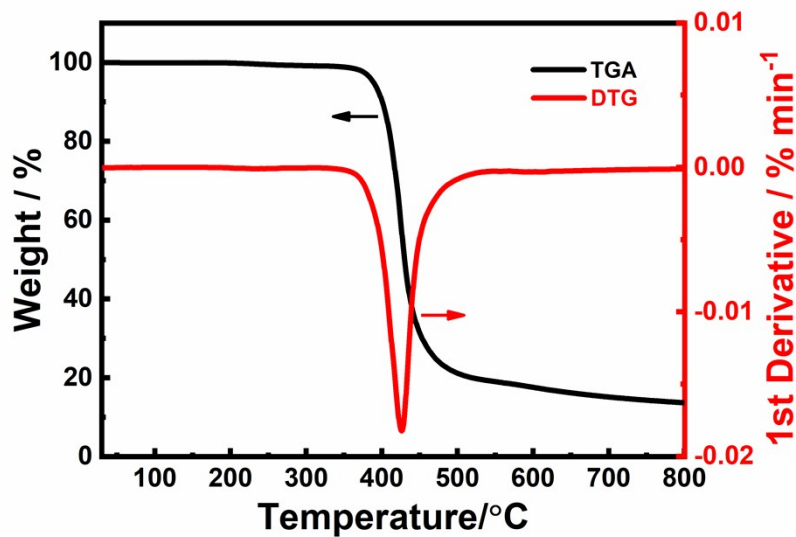

Fig. S2. The TGA and DTG curves of PYPZ monomer.

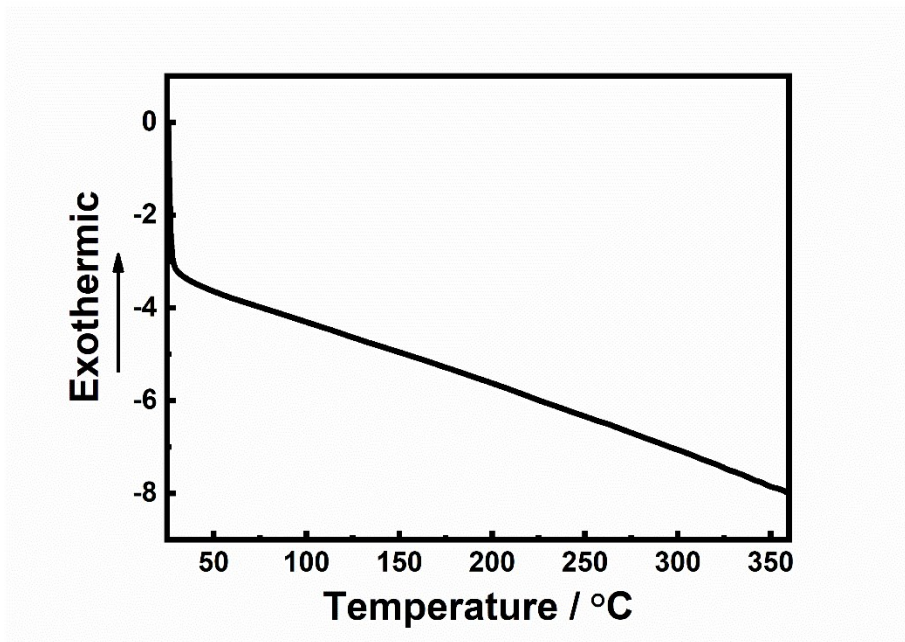

Fig. S3. The DSC curves of PYPZ monomer.

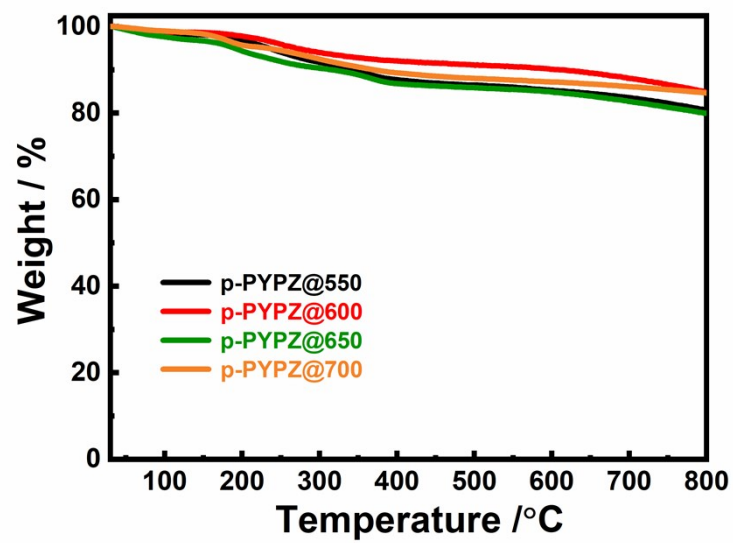

Fig. S4. The TGA spectra of p-PYPZs.

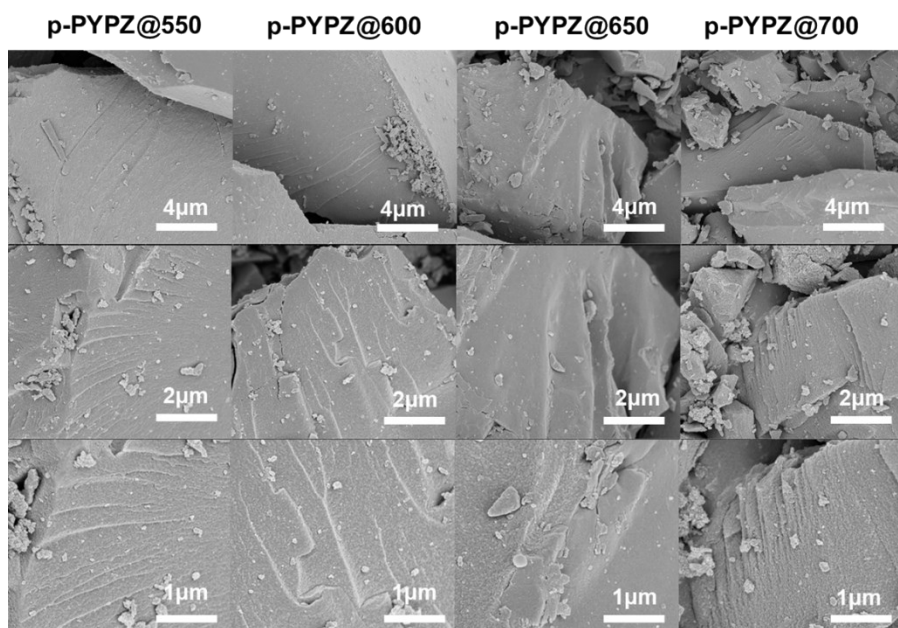

**Fig. S5.** SEM images of p-PYPZ@550, p-PYPZ@600, p-PYPZ@650, and p-PYPZ@700 at 1 μm, 2 μm, and 4 μm, respectively.

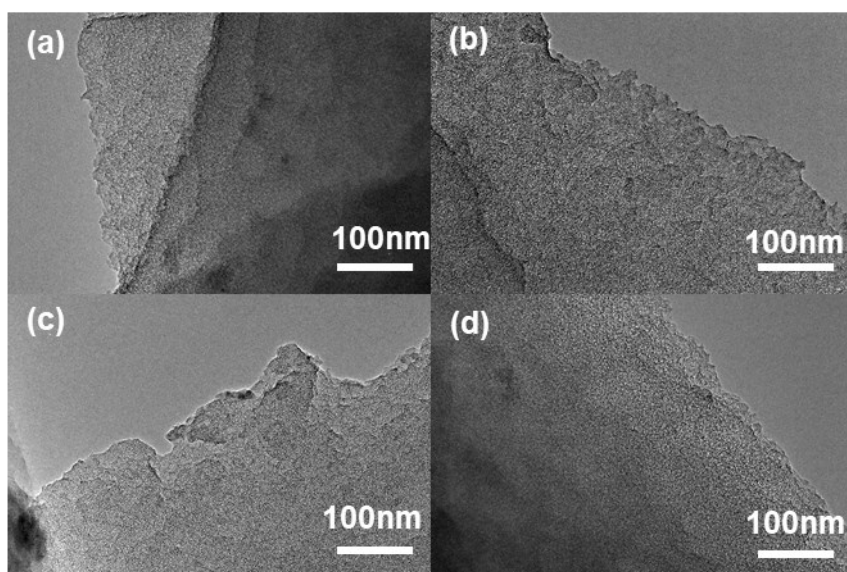

**Fig. S6.** TEM images of p-PYPZ@550, p-PYPZ@600, p-PYPZ@650, and p-PYPZ@700, respectively.

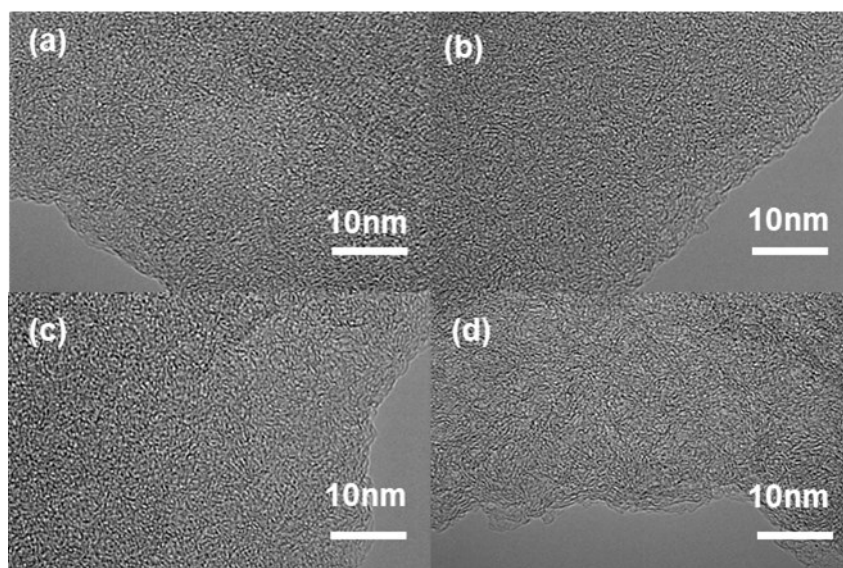

**Fig. S7.** HR-TEM images of p-PYPZ@550, p-PYPZ@600, p-PYPZ@650, and PYPZ@700, respectively.

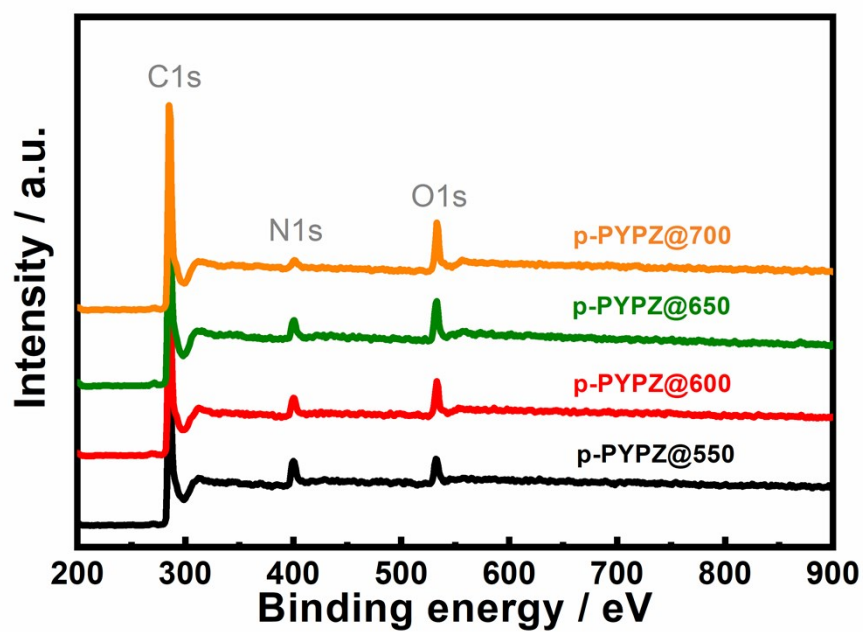

**Fig. S8.** XPS overall scanned spectrum of p-PYPZs

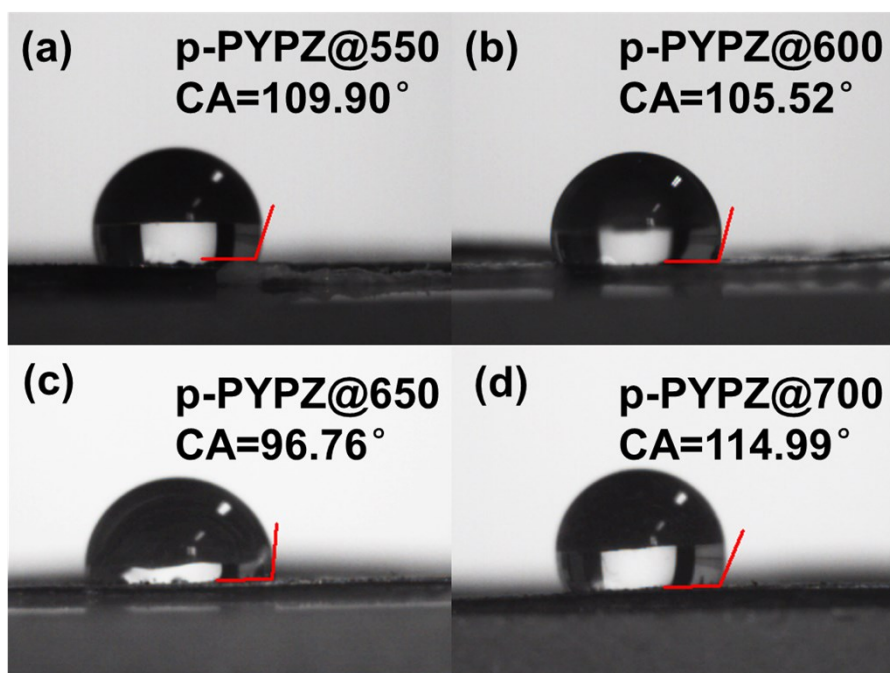

**Fig. S9.** Wetting angles of deionized water droplet on p-PYPZ@550, p-PYPZ@600, p-PYPZ@650, and PYPZ @700, respectively.



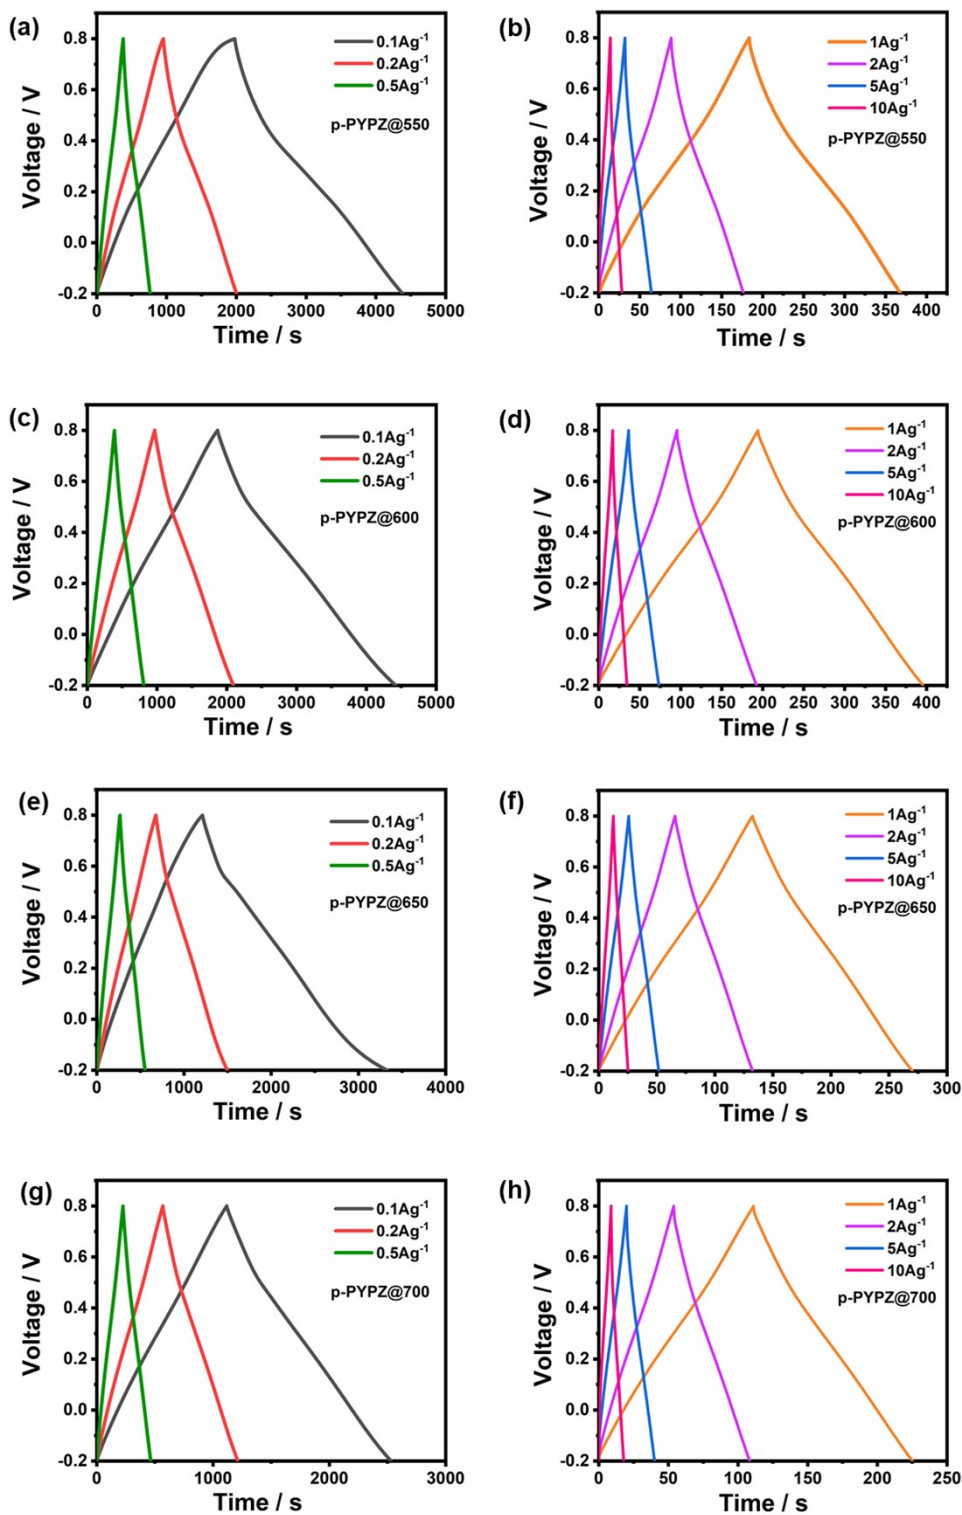

**Fig. S10.** The GC curves of p-PYPZS at various current densities in 1 M  $\text{H}_2\text{SO}_4$ : (a-b) GC measurements of p-PYPZ@550 at 0.1-10  $\text{A g}^{-1}$ ; (c-d) GC measurements of p-PYPZ@600 at 0.1-10  $\text{A g}^{-1}$ ; (e-f) GC measurements of p-PYPZ@650 at 0.1-10  $\text{A g}^{-1}$ ; (g-h) GC measurements of p-PYPZ@700 at 0.1-10  $\text{A g}^{-1}$ .

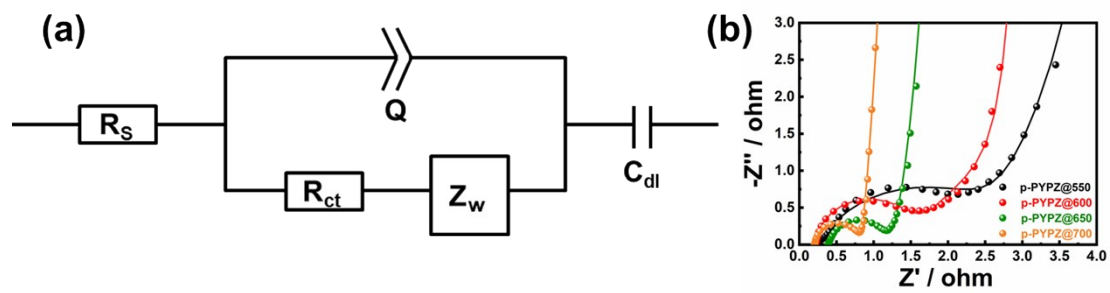

**Fig. S11.** (a) Equivalent circuit for the impedance spectra; (b) the equivalent circuit and the fitted data of EIS data of the p-PYPZs. (Points for experimental original data, and lines for fitting data)



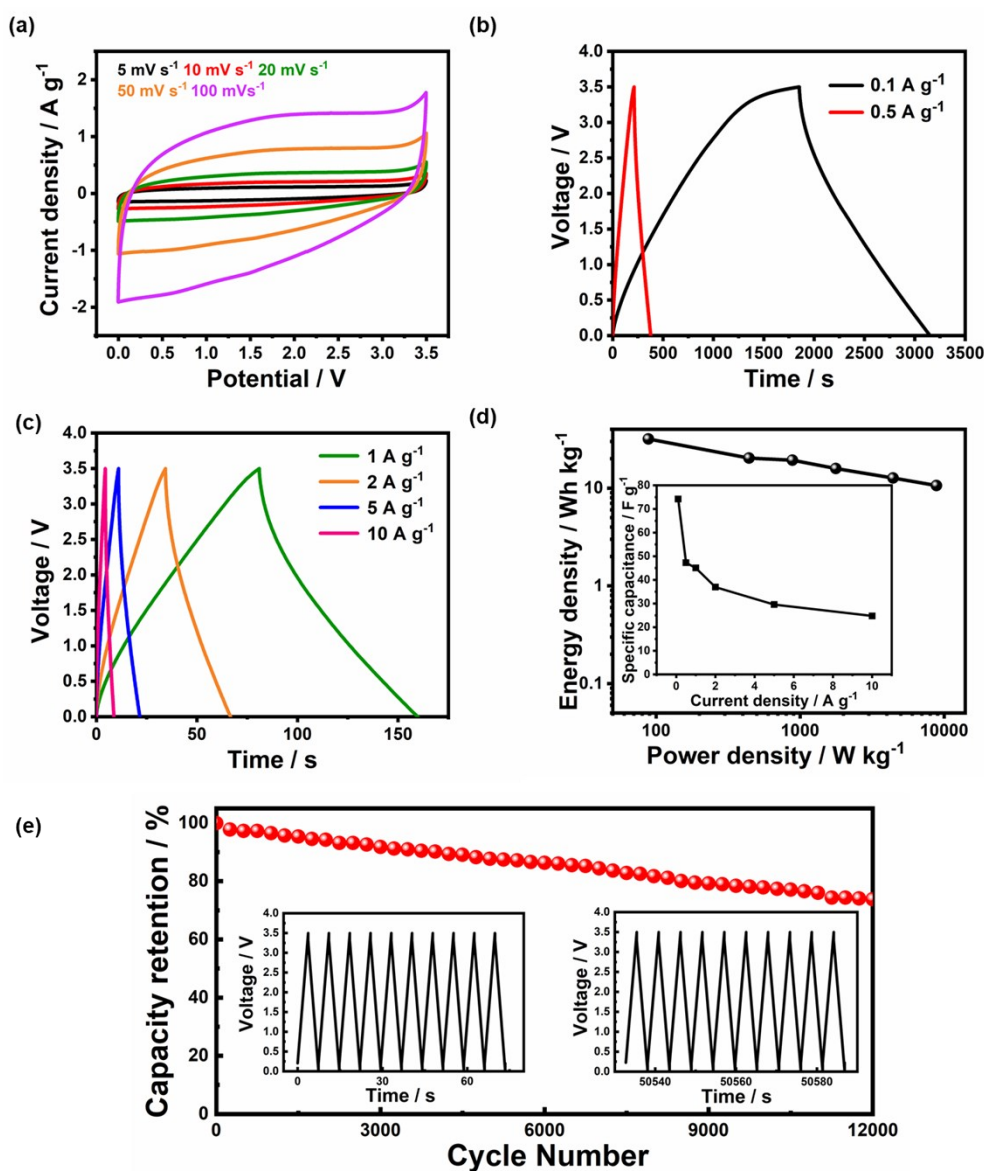

**Fig. S12.** (a) The CV curves of p-PYPZ@600 in [BMIM][BF<sub>4</sub>]; (b,c)The GC curves of p-PYPZ@600 at various current densities in [BMIM][BF<sub>4</sub>]; (d) Ragone plots (inset: specific capacitance at different current densities); (e) Long-term cycling tests of p-PYPZ@600 electrode with the electrolyte of [BMIM][BF<sub>4</sub>] (inset: GCD curves for the first and last 10 cycles).

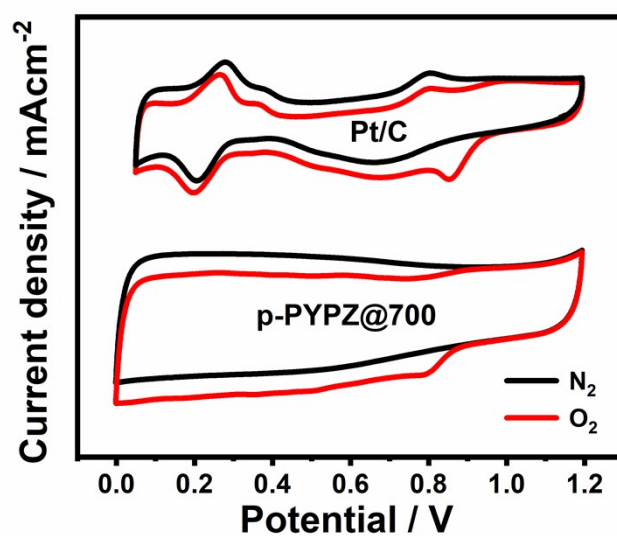

Fig. S13. The CV curves of Pt/C and p-PYPZ@700 in N<sub>2</sub> and O<sub>2</sub> saturated 0.1M KOH solution.

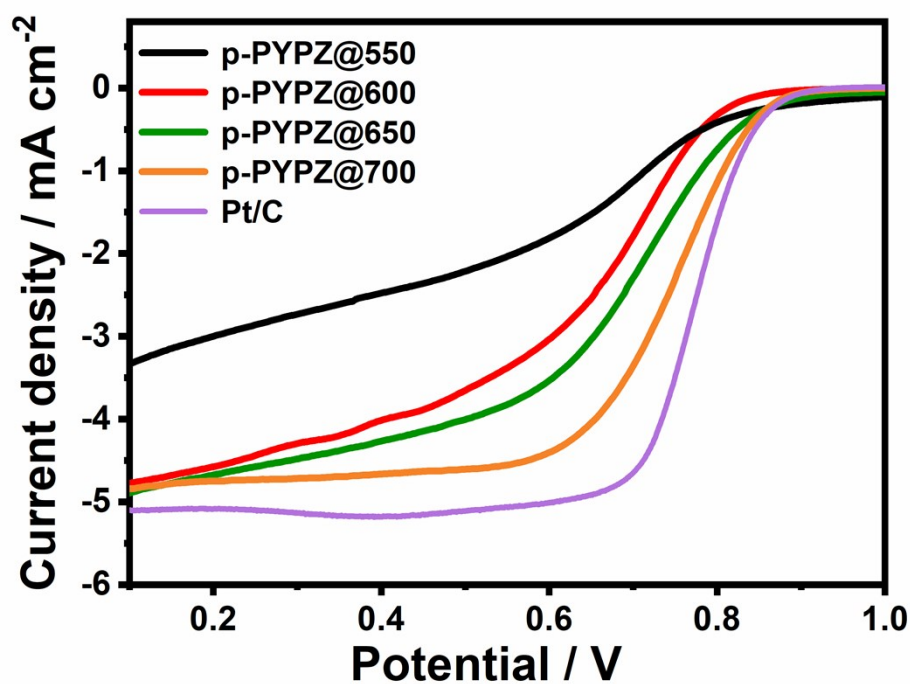

Fig. S14. The LSV curves of p-PYPZs and Pt/C.

**Tab. S1.** Atomic carbon, hydrogen and nitrogen contents of PYPZ based on elemental analysis.

|                   | C (wt.%) | H (wt.%) | N (wt.%) |
|-------------------|----------|----------|----------|
| Theoretical value | 64.29    | 2.70     | 18.74    |
| Measured value    | 64.13    | 2.73     | 18.78    |
| Relative error    | 0.16     | 0.03     | 0.04     |

**Tab. S2.** Element content analyzed via XPS and EA

| Samples    | XPS      |          | EA       |
|------------|----------|----------|----------|
|            | N (at.%) | O (at.%) | N (wt.%) |
| p-PYPZ@550 | 8.10     | 5.23     | 8.85     |
| p-PYPZ@600 | 6.48     | 5.92     | 6.82     |
| p-PYPZ@650 | 5.54     | 6.98     | 5.21     |
| p-PYPZ@700 | 3.46     | 5.18     | 3.50     |

**Tab. S3.** Relative content of N species obtained from the deconvolution analysis results of N1s core level XPS spectra

| Samples                 | N-5 <sup>b</sup> (%) | N-6 <sup>c</sup> (%) | N-Q <sup>d</sup> (%) |
|-------------------------|----------------------|----------------------|----------------------|
| p-PYPZ@550 <sup>a</sup> | 15.01                | 38.04                | 46.95                |
| p-PYPZ@600 <sup>a</sup> | 19.07                | 28.92                | 52.01                |
| p-PYPZ@650 <sup>a</sup> | 12.37                | 34.98                | 52.65                |
| p-PYPZ@700 <sup>a</sup> | 8.59                 | 23.97                | 67.44                |

<sup>a</sup> Relative intensity, data from XPS curves; <sup>b</sup> 399.7 eV from N1s XPS curves; <sup>c</sup> 398.0 eV from N1s XPS curves;

**Tab. S4.** Pore structures parameters of p-PYPZs

| Samples    | $S_{\text{BET}}^{\text{a}}$<br>( $\text{m}^2 \text{g}^{-1}$ ) | $V_{\text{t}}^{\text{b}}$<br>( $\text{cm}^3 \text{g}^{-1}$ ) | $L^{\text{c}}$<br>nm |
|------------|---------------------------------------------------------------|--------------------------------------------------------------|----------------------|
| p-TIDN@550 | 981.6                                                         | 0.65                                                         | 0.79                 |
| p-TIDN@600 | 999.4                                                         | 0.71                                                         | 0.85                 |
| p-TIDN@650 | 1242                                                          | 0.73                                                         | 0.82                 |
| p-TIDN@700 | 1464                                                          | 0.93                                                         | 0.82                 |

<sup>a</sup> Specific surface area of p-PYPZs is calculated by BET method in  $\text{N}_2$  (77K). <sup>b</sup> Total pore volume was determined at the relative pressure of 0.99. <sup>c</sup> Average pore sizes of p-PYPZs.

**Tab. S5** Comparison of the p-PYPZ@600 electrode with reported heteroatom-doped carbon electrodes in terms of cycle performance

| Sample                                                      | Heteroatoms                                        | S <sub>BET</sub> (m <sup>2</sup> g <sup>-1</sup> ) | Specific capacitance                             | Retention (cycles) | Electrolyte                        |
|-------------------------------------------------------------|----------------------------------------------------|----------------------------------------------------|--------------------------------------------------|--------------------|------------------------------------|
| p-PYPZ@600                                                  | N 6.48 at.%, O 5.92 at.%                           | 999                                                | 256 F g <sup>-1</sup> at 0.1 A g <sup>-1</sup>   | 110%(35000)        | 1 M H <sub>2</sub> SO <sub>4</sub> |
| NMC-4[1]                                                    | N 5.69 at.%                                        | 995                                                | 178.5 F g <sup>-1</sup> at 0.5 A g <sup>-1</sup> | 94.5%(5000)        | 6 M KOH                            |
| HN-CMs[2]                                                   | N 19.22 wt.%                                       | 323                                                | 266.7 F g <sup>-1</sup> at 5 mV s <sup>-1</sup>  | 94.7%(5000)        | 1M KOH                             |
| BN-Gas[3]                                                   | N 0.6 at.%, B 3.0 at.%                             | 249                                                | 239 F g <sup>-1</sup> at 1 mV s <sup>-1</sup>    | 100%(1000)         | 1 M H <sub>2</sub> SO <sub>4</sub> |
| NHPC-0.5[4]                                                 | N 12.1 at.%                                        | 1798                                               | 283.7 F g <sup>-1</sup> at 1 A g <sup>-1</sup>   | 105.8%(40000)      | 1 M H <sub>2</sub> SO <sub>4</sub> |
| Glu-(NH <sub>4</sub> ) <sub>3</sub> PO <sub>4</sub> -800[5] | N 4.8 wt.%, P 2.1 at.%, O 8.4 at.%                 | 445                                                | 184 F g <sup>-1</sup> at 0.05 A g <sup>-1</sup>  | >90%(2000)         | 6 M KOH                            |
| f-MHCFs@600[6]                                              | N 6.83 wt.%, P 2.25 at.%, O 6.22 at.%, F 7.23 at.% | 994                                                | 244.8 F g <sup>-1</sup> at 0.1 A g <sup>-1</sup> | 98.5%(10000)       | 1 M H <sub>2</sub> SO <sub>4</sub> |
| N1-GDY[7]                                                   | N 3.67 at.%                                        | 679                                                | 247 F g <sup>-1</sup> at 0.1 A g <sup>-1</sup>   | 95.6%(3000)        | 7 M KOH                            |
| HP-CF[8]                                                    | N 18.7%                                            | 1175                                               | 222.0 at 2 mV s <sup>-1</sup>                    | 91.2%(10000)       | 3 M KOH                            |
| CNB-3[9]                                                    | N 0.5 wt%, B 0.7 wt%                               | 376                                                | 247 at 0.5 A g <sup>-1</sup>                     | 96.2% (4000)       | 6 M KOH                            |

## References

- [1] G. Lin, R. Ma, Y. Zhou, C. Hu, M. Yang, Q. Liu, S. Kaskel, J. Wang, *J. Colloid Interface Sci.* 527 (2018) 230-240.
- [2] M. Hassan, D. Wu, X. Song, W. Qiu, Q. Mao, S. Ren, C. Hao, *Journal of Electroanalytical Chemistry* 829 (2018) 157-167.
- [3] Z.S. Wu, A. Winter, L. Chen, Y. Sun, A. Turchanin, X. Feng, K. Mullen, *Adv. Mater.* 24 (2012) 5130-5.
- [4] H. Sun, H. Quan, M. Pan, Z. Zhang, Y. Zeng, D. Chen, *Journal of Alloys and Compounds* 826 (2020).
- [5] C. Wang, Y. Zhou, L. Sun, P. Wan, X. Zhang, J. Qiu, *J. Power Sources* 239 (2013) 81-88.
- [6] F. Hu, T. Zhang, J. Wang, C. Liu, S. Li, S. Hu, X. Jian, *ACS Sustainable Chemistry & Engineering* 6 (2018) 15764-15772.
- [7] H. Shang, Z. Zuo, H. Zheng, K. Li, Z. Tu, Y. Yi, H. Liu, Y. Li, Y. Li, *Nano Energy* 44 (2018) 144-154.
- [8] Z. Chen, K. Liu, S. Liu, L. Xia, J. Fu, X. Zhang, C. Zhang, B. Gao, *Electrochimica Acta* 237 (2017) 102-108.
- [9] D.-C. Guo, J. Mi, G.-P. Hao, W. Dong, G. Xiong, W.-C. Li, A.-H. Lu, *Energy Environ. Sci.* 6 (2013) 652-659.
